# Supplementary material for: Extracellular Vesicles as Possible Plasma Markers and Mediators in Patients with Sepsis-Associated Delirium—A Pilot Study
Source: MDPI journal article supplement (doi:10.3390/ijms242115781), 2023-10-30
Supplement: s1 [file s1]

## Supplemental Results

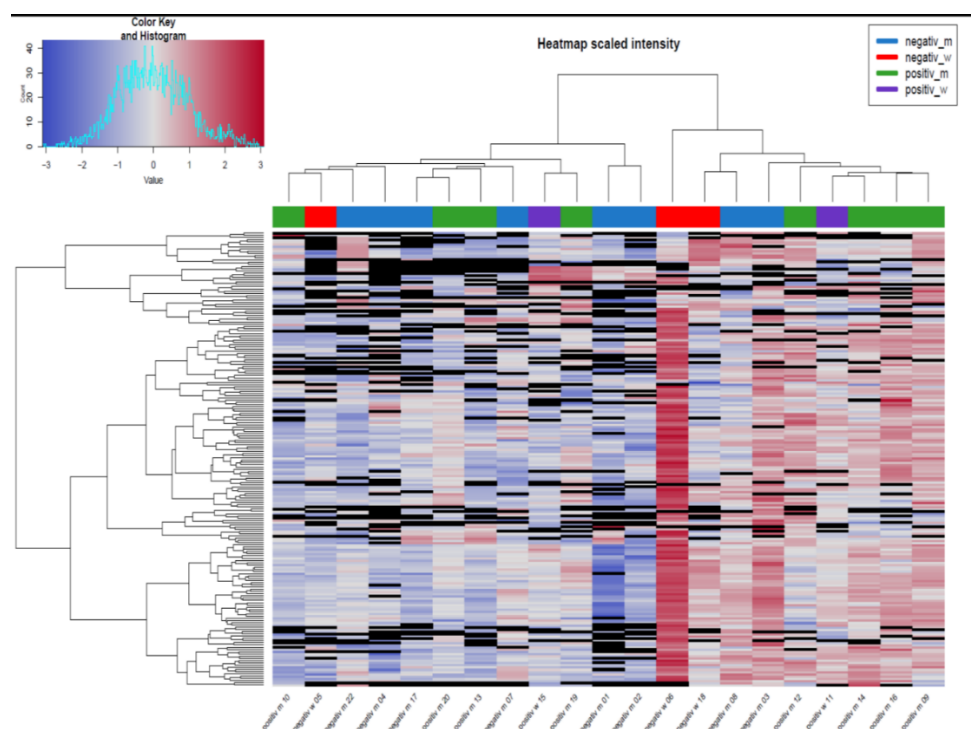

**Figure S1.** Log<sub>2</sub>iBAQ\_HeatmapScaled Intensity. Legend to Figure S1: Heatmap of scaled log<sub>2</sub> transformed iBAQ data for patients with and without delirium and differentiated for sex (m=male, w=female) and for SAD (positiv) and non-SAD (negativ) created in R with the function 'heatmap.2' from the 'gplots' package. The 'dist' function was set to 'euclidean' and 'hclust' to 'ward.D2'. Missing values are displayed in black.

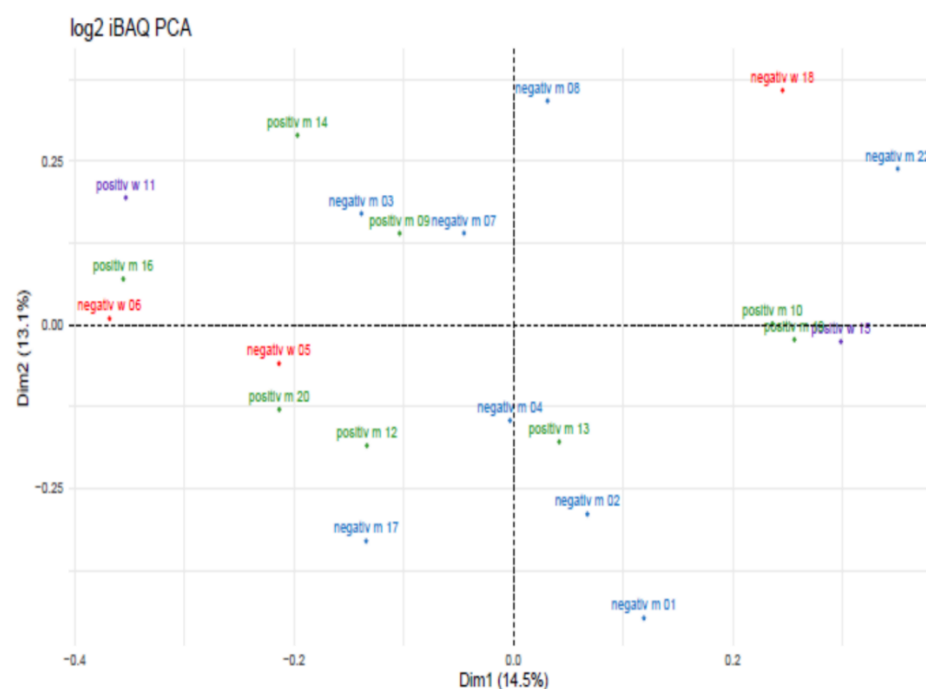

**Figure S2.** Log<sub>2</sub> iBAQ PCA. Legend to Figure S2: Principle component analysis (PCA) based on log<sub>2</sub> transformed iBAQ data. Created in R based on the 'InDaPCA' for patients with and without delirium and differentiated for gender (m=male, f=female, SAD = positiv, non-SAD=negativ).
